# Supplementary material
Source: MDPI journal article supplement (https://www.mdpi.com/2220-9964/6/9/274)
Supplement: s1 [file s1]

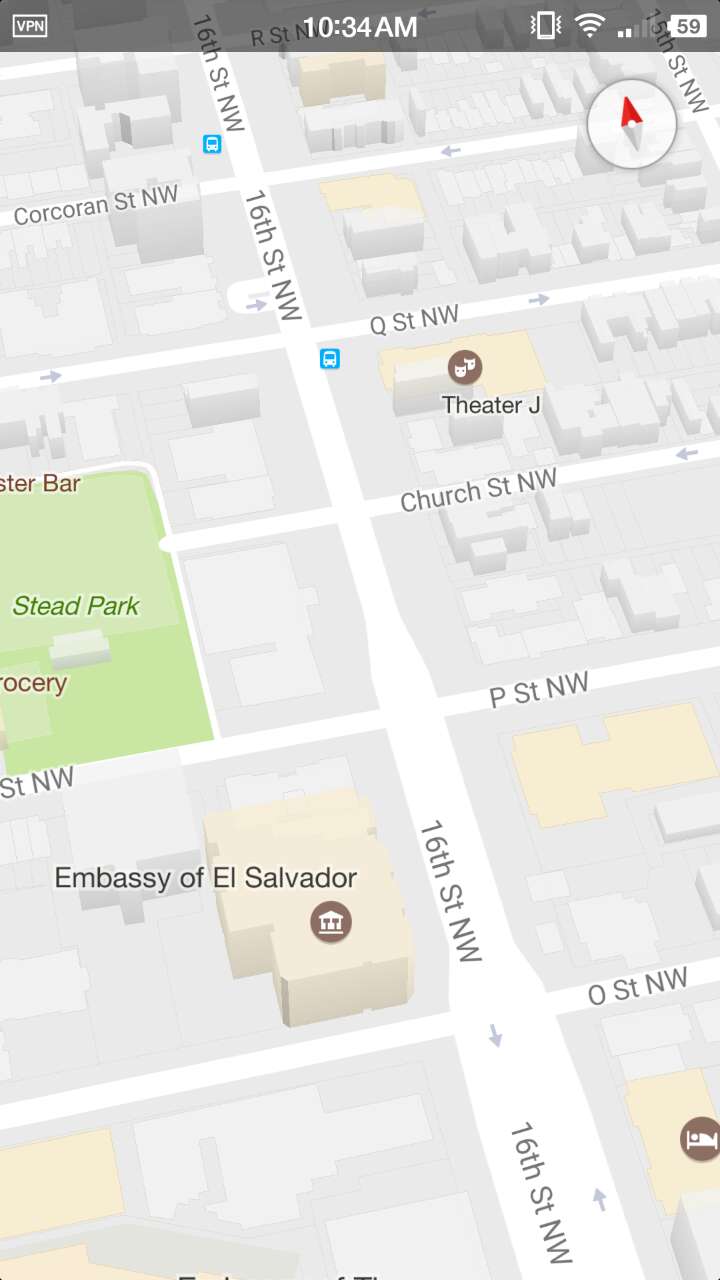

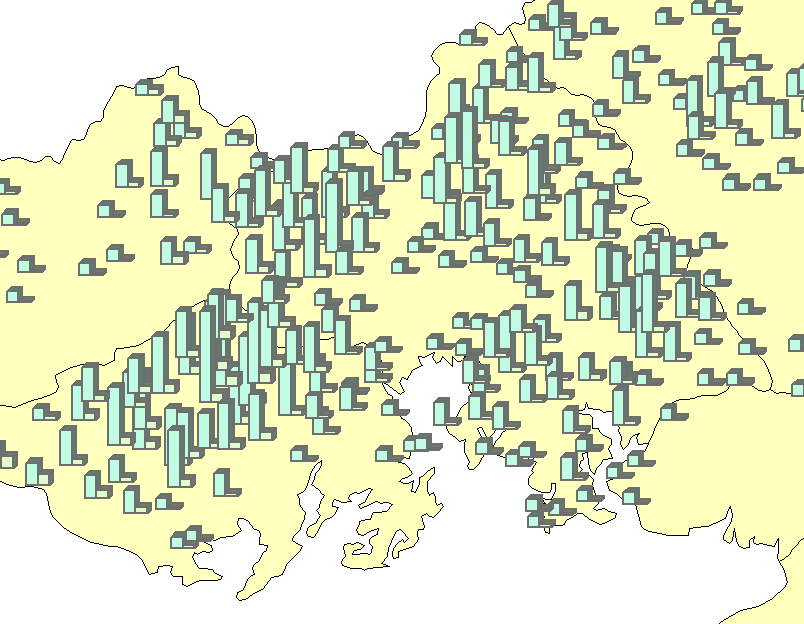


**Supplementary Figure 1.** 3D buildings in Google Maps and 3D data bars in ArcGIS.

| Position | | 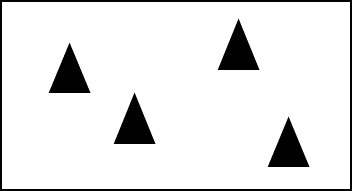 |
| --- | --- | --- |
| Size | | 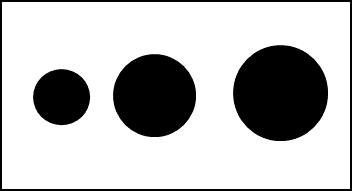 |
| Texture | Arrangement | 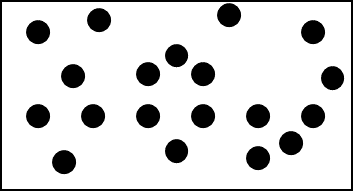 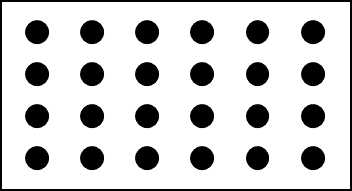 |
| Directionality | 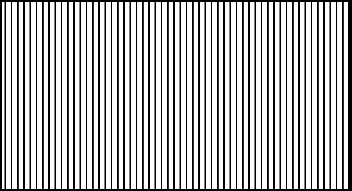 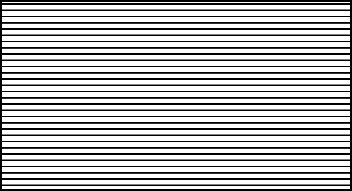 |
| Size | 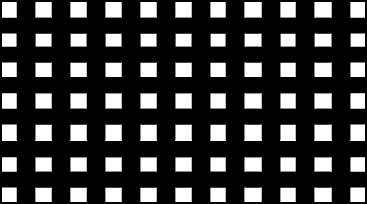 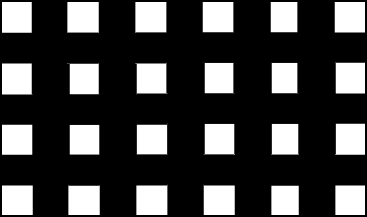 |
| Density | 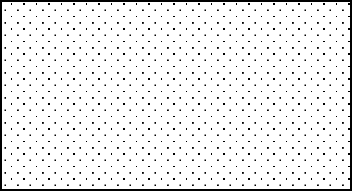 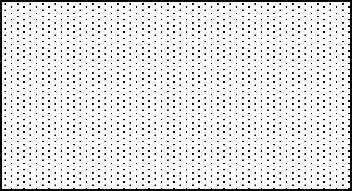 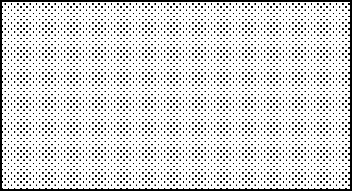 |
| Color | Hue | 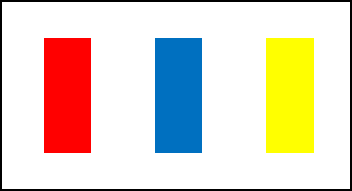 |
| Saturation | 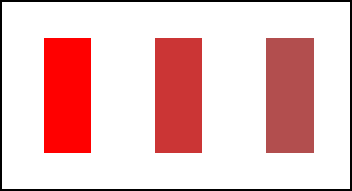 |
| Value | 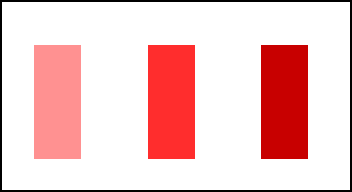 |
| Orientation | | 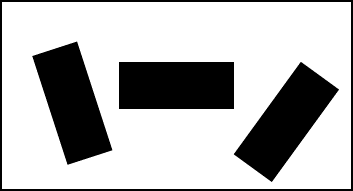 |
| Shape | | 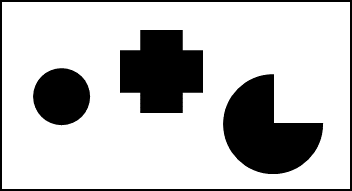 |
| Crispness | | 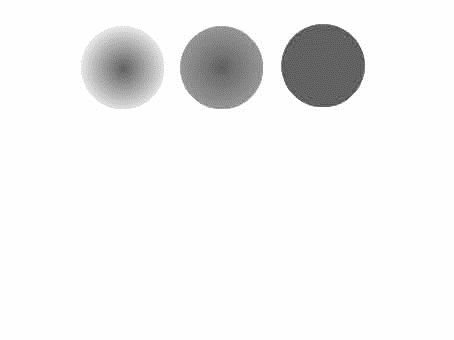 |
| Resolution | | 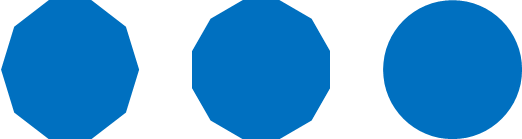 |
| Transparency | | 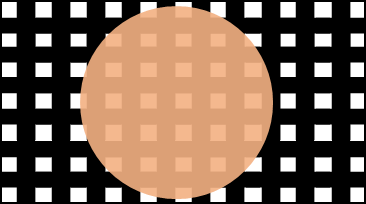 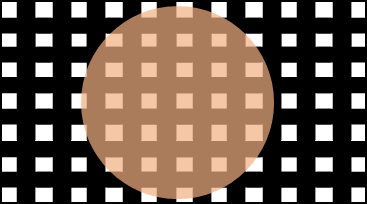 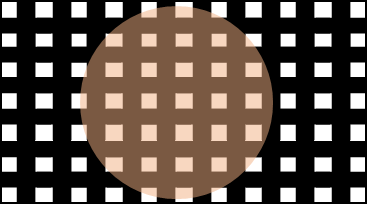 |

**Supplementary Figure 2.** Visual variables (redrawn based on the summaries of (MacEachren 1995)[MacEachren (1995)](#_ENREF_2) and [Roth (2017)](#_ENREF_3)).

**Supplementary Table 1.** Guidance and constancy properties of color hue/saturation, size and shape*

| Visual Variable | Guidance | | Constancy | |
| --- | --- | --- | --- | --- |
|  | 2D | 1D | 2D | Physical World/Virtual Reality |
| Color hue | Undoubted | - | - | - |
| Color saturation | - | - | - | Probable |
| Size | Undoubted | Undoubted | Not Probable | Possible |
| Shape | Probable | Possible | - | Undoubted |

*Undoubted, Probable, Possible, and Not Probable denote four classes with the following characteristics: supported by many studies, supported but with limited data or dissenting opinions, with relatively low confidence, and opposed by many studies, respectively ([Wolfe & Horowitz, 2004](#_ENREF_4)).

**Supplementary Table 2.** [Bertin (1983)](#_ENREF_1)’s category of visual variables

|  | Associative | Selective | Ordered | Quantitative* |
| --- | --- | --- | --- | --- |
| Size | N | Y | Y | Y |
| Value | N | Y | Y |  |
| Texture | Y | Y | Y |  |
| Color(hue) | Y | Y |  |  |
| Orientation | Y | N/Y |  |  |
| Shape | Y |  |  |  |
| * Associative: variable that permits the immediate grouping of all correspondences differentiated by that variable; | | | | |
| Selective: variable that enables people to quickly isolate all symbols of the same category; | | | | |
| Ordered: variable that allows people to perceptually rank symbols easily; | | | | |
| Quantitative: variable allows people to quantify the degree of difference between two categories in terms of a numerical ratio. | | | | |

**Supplementary Table 3.** Latin Square design for Exp. 2: ①-⑥ represent six different scenes, and A-F represent the objects that truly varied

| Order  Group | ① | ② | ③ | ④ | ⑤ | ⑥ |
| --- | --- | --- | --- | --- | --- | --- |
| G1 | A | B | C | D | E | F |
| G2 | B | C | D | E | F | A |
| G3 | C | D | E | F | A | B |
| G4 | D | E | F | A | B | C |
| G5 | E | F | A | B | C | D |
| G6 | F | A | B | C | D | E |

Bertin, J. (1983). Semiology of graphics: diagrams, networks, maps

MacEachren, A. M. (1995). How maps work: representation, visualization, and design: Guilford Press.

Roth, R. E. (2017). Visual Variables. The International Encyclopedia of Geography, 1-11. doi: 10.1002/9781118786352.wbieg0761

Wolfe, J. M., & Horowitz, T. S. (2004). What attributes guide the deployment of visual attention and how do they do it? Nature Reviews Neuroscience, 5(6), 495-501. doi: 10.1038/nrn1411


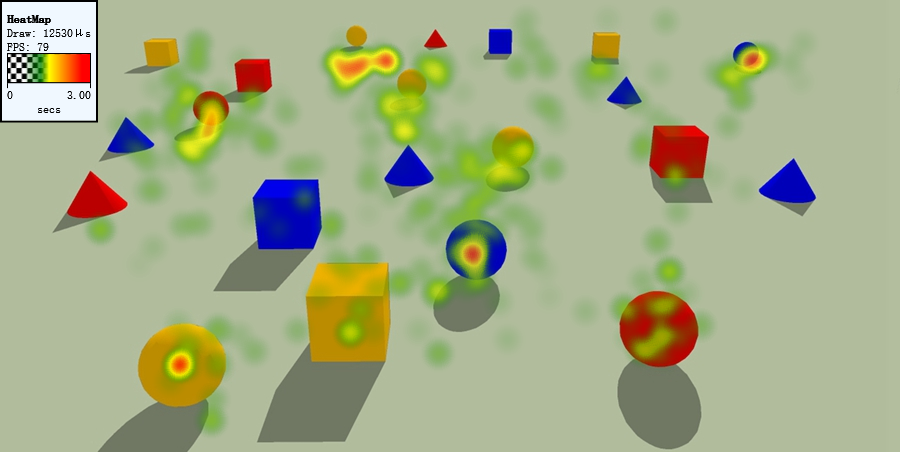

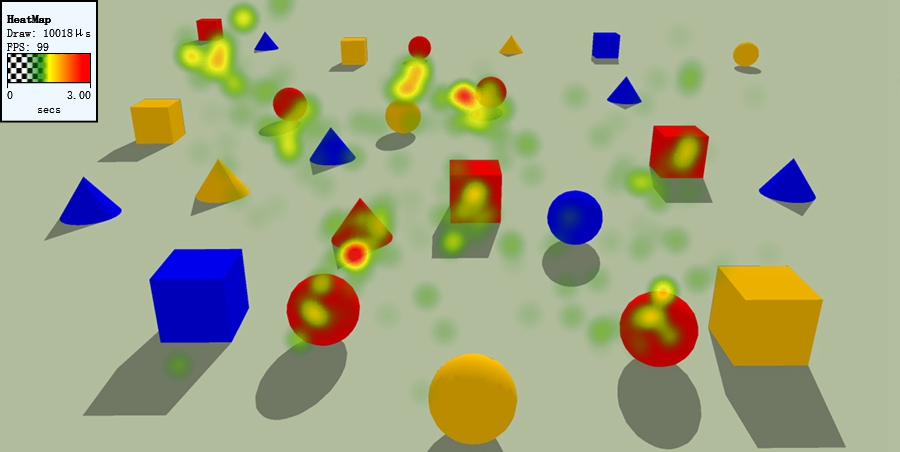

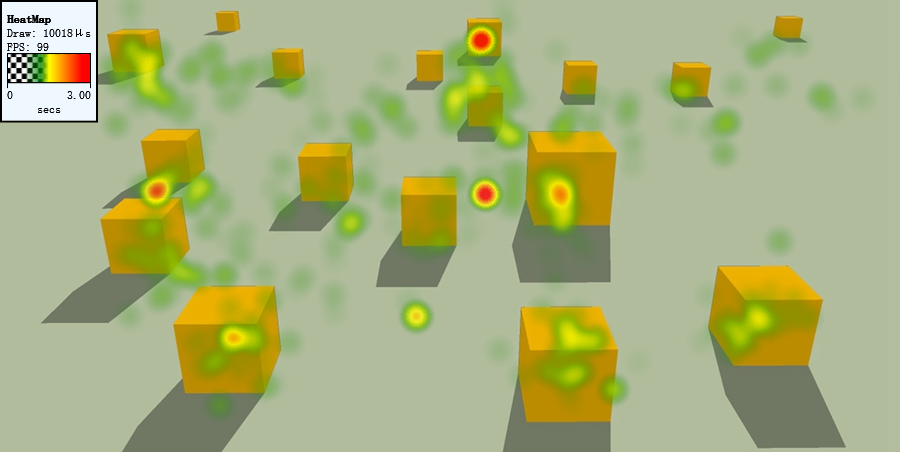


(a)

(b)

**Supplementary Figure 3.** Heat maps (fixation duration) for G1 for the guidance tasks (Figure 5(a) for shape [sphere], Figure 5(b) for color [red] and Figure 5(c) for size). For shape and hue, fixation heat is mainly concentrated on or around spheres and red symbols, respectively (i.e., the targets). Heat points are primarily located on the cubes, which appeared larger on the screen (1, 2, 4, 5, and 6), rather than on the objects that actually were larger, which are indicated in Figure 2.
